# Supplementary material for: New Series of Red-Light Phosphor Ca9−xZnxGd0.9(PO4)7:0.1Eu3+ (x = 0–1)
Source: MDPI journal article supplement (doi:10.3390/molecules28010352), 2023-01-01
Supplement: s1 [file s1]

# New Series of Red-Light Phosphor

## $\text{Ca}_{9-x}\text{Zn}_x\text{Gd}_{0.9}(\text{PO}_4)_7:0.1\text{Eu}^{3+}$ ( $x = 0-1$ )

Yury Yu. Dikhtyar <sup>1</sup>, Dmitry A. Spassky <sup>2,3,\*</sup>, Vladimir A. Morozov <sup>1</sup>, Sergey N. Polyakov <sup>4</sup>,  
Valerya D. Romanova <sup>1</sup>, Sergey Yu. Stefanovich <sup>1</sup>, Dina V. Deyneko <sup>1,5</sup>, Oksana V. Baryshnikova <sup>1</sup>,  
Ivan V. Nikiforov <sup>1</sup> and Bogdan I. Lazoryak <sup>1</sup>

**Table S1.** The unit cells parameters, SHG signals ( $I_{2\omega}/I_{2\omega}(\text{SiO}_2)$ ) and supposed SG for  $\text{Ca}_{9-x}\text{Zn}_x\text{Gd}(\text{PO}_4)_7:0.1\text{Eu}^{3+}$  compounds.

| $x$  | $a$ , Å    | $c$ , Å   | $V$ , Å <sup>3</sup> | $I_{2\omega}/I_{2\omega}(\text{SiO}_2)$ | Supposed space group |
|------|------------|-----------|----------------------|-----------------------------------------|----------------------|
| 0.00 | 10.4489(4) | 37.459(3) | 3541.8(3)            | 1.10(5)                                 |                      |
| 0.05 | 10.4537(4) | 37.481(3) | 3547.2(3)            | 1.05(5)                                 |                      |
| 0.10 | 10.4487(4) | 37.459(3) | 3541.7(3)            | 1.00(5)                                 |                      |
| 0.15 | 10.4419(4) | 37.444(3) | 3535.7(3)            | 0.95(5)                                 | $R3c$                |
| 0.20 | 10.4431(4) | 37.468(3) | 3538.8(4)            | 1.05(5)                                 |                      |
| 0.25 | 10.4398(8) | 37.451(5) | 3534.9(6)            | 0.95(5)                                 |                      |
| 0.30 | 10.4387(4) | 37.448(3) | 3533.8(4)            | 0.95(5)                                 |                      |
| 0.35 | 10.4346(4) | 37.444(3) | 3530.7(3)            | 0.90(5)                                 |                      |
| 0.40 | 10.4298(4) | 37.423(3) | 3525.5(4)            | 0.70(5)                                 |                      |
| 0.45 | 10.4182(4) | 37.396(3) | 3515.1(3)            | 0.50(5)                                 |                      |
| 0.50 | 10.3980(4) | 37.278(3) | 3490.4(3)            | 0.45(5)                                 |                      |
| 0.55 | 10.3913(3) | 37.263(2) | 3484.0(3)            | 0.30(5)                                 | $R3c + R\bar{3}c$    |
| 0.60 | 10.3880(4) | 37.250(3) | 3481.2(3)            | 0.25(5)                                 |                      |
| 0.65 | 10.3772(3) | 37.184(2) | 3468.1(2)            | 0.20(5)                                 |                      |
| 0.70 | 10.3720(5) | 37.080(2) | 3440.9(3)            | 0.10(5)                                 |                      |
| 0.75 | 10.3700(6) | 37.150(2) | 3459.8(3)            | 0.07(5)                                 |                      |

|      |            |           |           |         |             |
|------|------------|-----------|-----------|---------|-------------|
| 0.80 | 10.3680(7) | 37.145(3) | 3458.0(4) | 0.06(5) | $R\bar{3}c$ |
| 0.85 | 10.3641(7) | 37.132(3) | 3454.1(4) | 0.00(5) |             |
| 0.90 | 10.3609(7) | 37.116(3) | 3450.6(4) | 0.00(5) |             |
| 0.95 | 10.3596(7) | 37.113(3) | 3449.3(4) | 0.00(5) |             |
| 1.00 | 10.3596(6) | 37.100(2) | 3448.2(3) | 0.00(5) |             |

**Table S2.** Fractional atomic coordinates, site symmetry, isotropic displacement atomic parameters ( $U_{\text{iso}}$ ) and site occupation for  $\text{Ca}_8\text{ZnGd}(\text{PO}_4)_7$  from PXRD data.

| Atom | Site  | $x$       | $y$       | $z$       | $U_{\text{iso}} \times 100$ | Occupancy $a_i$ , M        |
|------|-------|-----------|-----------|-----------|-----------------------------|----------------------------|
| $M1$ | $36f$ | 0.7230(1) | 0.8511(3) | 0.4342(1) | 0.36(4)                     | 0.8770(1) $\text{Ca}^{2+}$ |
|      |       |           |           |           |                             | 0.1230(2) $\text{Gd}^{3+}$ |
| $M3$ | $36f$ | 0.1356(9) | 0.2750(6) | 0.3264(1) | 2.88(3)                     | 0.4576 $\text{Ca}^{2+}$    |
|      |       |           |           |           |                             | 0.0424 $\text{Gd}^{3+}$    |
| $M5$ | $6b$  | 0         | 0         | 0         | 0.05(1)                     | $\text{Zn}^{2+}$           |
| P1   | $12c$ | 0         | 0         | 0.2687(3) | 0.01(1)                     | 0.5P                       |
| P2   | $36f$ | 0.3174(3) | 0.1741(5) | 0.3644(1) | 0.14(2)                     | P                          |
| O1   | $12c$ | 0         | 0         | 0.3113(1) | 0.64(1)                     | 0.5O                       |
| O2   | $36f$ | 0.0097(2) | 0.8592(2) | 0.2600(4) | 0.64(1)                     | 0.5O                       |
| O3   | $36f$ | 0.2793(6) | 0.1683(8) | 0.3237(2) | 0.64(1)                     | O                          |
| O4   | $36f$ | 0.2474(9) | 0.0157(9) | 0.3840(2) | 0.64(1)                     | O                          |
| O5   | $36f$ | 0.2722(9) | 0.2871(9) | 0.3826(2) | 0.64(1)                     | O                          |
| O6   | $36f$ | 0.4978(7) | 0.2528(2) | 0.3690(1) | 0.64(1)                     | O                          |

**Table S3.** Selected distances (Å) in Ca<sub>8</sub>ZnGd(PO<sub>4</sub>)<sub>7</sub> from PXRD data.

| Polyhedron              | Distance         | <i>d</i> , Å | Polyhedron              | Distance        | <i>d</i> , Å |
|-------------------------|------------------|--------------|-------------------------|-----------------|--------------|
| <i>M1O</i> <sub>9</sub> | <i>M1</i> -O2    | 2.447(9)     | <i>M3O</i> <sub>8</sub> | <i>M3</i> -O1   | 2.534(5)     |
|                         | <i>M1</i> -O2    | 2.366(9)     |                         | <i>M3</i> -O2   | 2.796(2)     |
|                         | <i>M1</i> -O3    | 2.318(7)     |                         | <i>M3</i> -O3   | 2.261(9)     |
|                         | <i>M1</i> -O4    | 2.283(9)     |                         | <i>M3</i> -O3   | 2.735(9)     |
|                         | <i>M1</i> -O4    | 2.679(9)     |                         | <i>M3</i> -O4   | 2.558(9)     |
|                         | <i>M1</i> -O5    | 2.399(9)     |                         | <i>M3</i> -O4   | 2.573(9)     |
|                         | <i>M1</i> -O5    | 2.552(9)     |                         | <i>M3</i> -O5   | 2.492(9)     |
|                         | <i>M1</i> -O6    | 2.423(9)     |                         | <i>M3</i> -O5   | 2.255(9)     |
|                         | <i>M1</i> -O6    | 2.468(9)     |                         | < <i>M3</i> -O> | 2.526(8)     |
|                         | < <i>M1</i> -O>  | 2.437(9)     |                         |                 |              |
| <i>M5O</i> <sub>6</sub> | 6× <i>M5</i> -O6 | 2.014(6)     | <i>P2O</i> <sub>4</sub> | <i>P2</i> -O3   | 1.555(7)     |
| <i>P1O</i> <sub>4</sub> | <i>P1</i> -O1    | 1.582(9)     |                         | <i>P2</i> -O4   | 1.601(9)     |
|                         | 3× <i>P1</i> -O2 | 1.547(9)     |                         | <i>P2</i> -O5   | 1.612(9)     |
|                         |                  |              |                         | <i>P2</i> -O6   | 1.634(7)     |
|                         | < <i>P1</i> -O>  | 1.556(9)     |                         | < <i>P2</i> -O> | 1.601(8)     |
